# Supplementary material for: Design of a Computer Model for the Identification of Adolescent Swimmers at Risk of Low BMD
Source: Int J Environ Res Public Health. 2023 Feb 16;20(4):3454. doi: 10.3390/ijerph20043454 (PMC9964481; doi:10.3390/ijerph20043454)
Supplement: Supplementary file 1 [file ijerph-20-03454-s001.zip › Supplementary Document S1.pdf]

Document S1: The code used for the construction of both models

*#loading necessary packages*

```
library(dplyr)
library(rpart)
library(rpart.plot)
library(gbm)
library(ggplot2)
library(vip)
library(pdp)
library(boot)
library(ggpubr)
```

*#loading data and isolating the variables included in model construction*

```
load("RENACIMIENTO.RData")
treeDB<-renacimiento[,c(12,2:9,30:37)]
```

*#for reproducibility*

```
set.seed(1)
```

*#randomly selecting 70% of the sample*

```
random_index<-sample(1:nrow(treeDB),nrow(treeDB))
treeDB<-treeDB[random_index,]
train<-sample(1:78,round(78*0.7,0))
```

*#creating a matrix to test different hyper-parameter values*

```
hyper_grid <- expand.grid(
  shrinkage = c(.01, .1, .3),
  interaction.depth = c(1, 3, 5),
  n.minobsinnode = c(2, 5, 8),
  bag.fraction = c(.5, .75, 1),
  optimal_trees = 0,
  min_RMSE = 0
)
```

*# grid search*

```
for(i in 1:nrow(hyper_grid)) {
```

*# reproducibility*

```
set.seed(123)
```

*# training model*

```
gbm.tune <- gbm(
  formula = totalBMD ~ .,
  distribution = "gaussian",
  data = treeDB[train,],
  n.trees = 100,
  interaction.depth = hyper_grid$interaction.depth[i],
  shrinkage = hyper_grid$shrinkage[i],
  n.minobsinnode = hyper_grid$n.minobsinnode[i],
  bag.fraction = hyper_grid$bag.fraction[i],
  train.fraction = .75
)
```

```

# adding min training error and trees to grid
hyper_grid$optimal_trees[i] <- which.min(gbm.tune$valid.error)
hyper_grid$min_RMSE[i] <- sqrt(min(gbm.tune$valid.error))
}

#checking best fits
hyper_grid %>%
  dplyr::arrange(min_RMSE) %>%
  head(10)

#fine-tuning hyper-parameter based on previous results
hyper_grid_fine <- expand.grid(
  shrinkage = c(.1, .2, .3),
  interaction.depth = c(3,5,7),
  n.minobsinnode = c(2,3,4,5),
  bag.fraction = c(.5,.625,.75),
  optimal_trees = 0,          # a place to dump results
  min_RMSE = 0               # a place to dump results
)

# new grid search
for(i in 1:nrow(hyper_grid_fine)) {

# reproducibility
set.seed(123)

# training model
gbm.tune <- gbm(
  formula = totalBMD ~ .,
  distribution = "gaussian",
  data = treeDB[train,],
  n.trees = 100,
  interaction.depth = hyper_grid_fine$interaction.depth[i],
  shrinkage = hyper_grid_fine$shrinkage[i],
  n.minobsinnode = hyper_grid_fine$n.minobsinnode[i],
  bag.fraction = hyper_grid_fine$bag.fraction[i],
  train.fraction = 0.75
)

# adding min training error and trees to grid
hyper_grid_fine$optimal_trees[i] <- which.min(gbm.tune$valid.error)
hyper_grid_fine$min_RMSE[i] <- sqrt(min(gbm.tune$valid.error))
}

#checking new best fits
hyper_grid_fine %>%
  dplyr::arrange(min_RMSE) %>%
  head(10)

#building single model with the identified parameters
set.seed(123)
boost.fit<-gbm(totalBMD~.,

```

```
distribution="gaussian",
data=treeDB[train,],
n.trees=50,
interaction.depth = 3,
n.minobsinnode = 3,
bag.fraction=0.75,
shrinkage=0.3,
cv.folds=5)
```

*#checking model results*

```
boost.fit
```

*#plotting model performance*

```
png(filename = "cvError.png",width=1600,height=1600,units="px",res=300)
gbm.perf(boost.fit, method = "cv")
dev.off()
```

*#plotting relative importance of variables*

```
png(filename = "relativeImportance.png",width=1600,height=1600,units="px",res=300)
par(mar = c(5, 8, 1, 1))
vip::vip(boost.fit,n.trees=50,num_features=9)+theme_classic()+ylab("Relative influence (%)")
dev.off()
```

*#predicting risk in test data to include them in the database*

```
pred<-predict(boost.fit,n.trees=50,newdata=treeDB[-train,])
```

*#loading database with the predicted and actual BMD values and its correspondent Z-score*

```
load("predMat.RData")
```

*#calculating root mean squared error*

```
sqrt(mean((predMat$realBMD-pred)^2))
```

*#showing the accuracy of the prediction*

```
table(real=!predMat$realAdjZ>-1,pred=!predMat$predAdjZ>-1)
```

*#building single tree for practical application*

```
indTreeDB<-renacimiento[,c(38,2:9,30:37)]
indTreeDB<-indTreeDB[random_index,]
indTree<-rpart(risk~height+weight+finapoints+handgrip+swimYears+time30m+time50m+BMI+age,
data=indTreeDB[train,],method="class",minsplit=20,
parms=list(loss=matrix(c(0,1,1,0),byrow=TRUE,nrow=2)))
```

*#plotting contents of the individual tree*

```
png(filename = "individualTree.png",width=1600,height=1600,units="px",res=300)
rpart.plot(indTree,box.palette=gray(seq(.6, 1, length.out=9)),type=5,extra=0)
dev.off()
```

*#calculating the prediction on the remaining 30% of the sampling*

```
indPred<-predict(indTree,newdata=indTreeDB[-train,])[2]>1/2
```

*#showing the accuracy of the prediction*

```
table(real=!predMat$realAdjZ>-1,pred=indPred)
```
