# Supplementary material for: Design of a Computer Model for the Identification of Adolescent Swimmers at Risk of Low BMD
Source: Int J Environ Res Public Health. 2023 Feb 16;20(4):3454. doi: 10.3390/ijerph20043454 (PMC9964481; doi:10.3390/ijerph20043454)
Supplement: Supplementary file 1 [file ijerph-20-03454-s001.zip › Supplementary Table S1.pdf]

**Supplementary Table S1.** Summary of the variables included in the regression and decision trees.

| Variable type                      | Variable names                                                                                                                                                                                                                                   |
|------------------------------------|--------------------------------------------------------------------------------------------------------------------------------------------------------------------------------------------------------------------------------------------------|
| Predicted outcome:                 | Subtotal (whole body less head) bone mineral density (BMD)                                                                                                                                                                                       |
| Physical fitness:                  | <b>Speed:</b> Time to complete a 30-m sprint run<br><b>Handgrip strength:</b> Sum of best attempts with both arms<br>Lower-limb strength: Distance in a standing long jump<br>Endurance: VO <sub>2max</sub> estimated from 20-m shuttle-run test |
| Swimming training and performance: | Weekly training hours, <b>years of swimming history, time in 50-m swim, FINA points</b>                                                                                                                                                          |
| Potential confounders:             | <b>Age</b> , sex, Tanner stage, <b>height, weight, BMI</b> , calcium intake, participation in other sports                                                                                                                                       |

Abbreviations: BMD: bone mineral density; BMI: body mass index; VO<sub>2max</sub>: maximal oxygen uptake; FINA: International Swimming Federation.

The variables highlighted in bold were statistically significant within the ensemble model and were therefore used to construct the individual decision tree.
